# Supplementary material for: Blood Pressure Affects the Early CT Perfusion Imaging in Patients with aSAH Reflecting Early Disturbed Autoregulation
Source: PubMed Central journal article supplement (PMC10499698; doi:10.1007/s12028-023-01683-8), 2023-02-17
Supplement: 12028_2023_1683_MOESM1_ESM.pdf [file 12028_2023_1683_MOESM1_ESM.pdf]

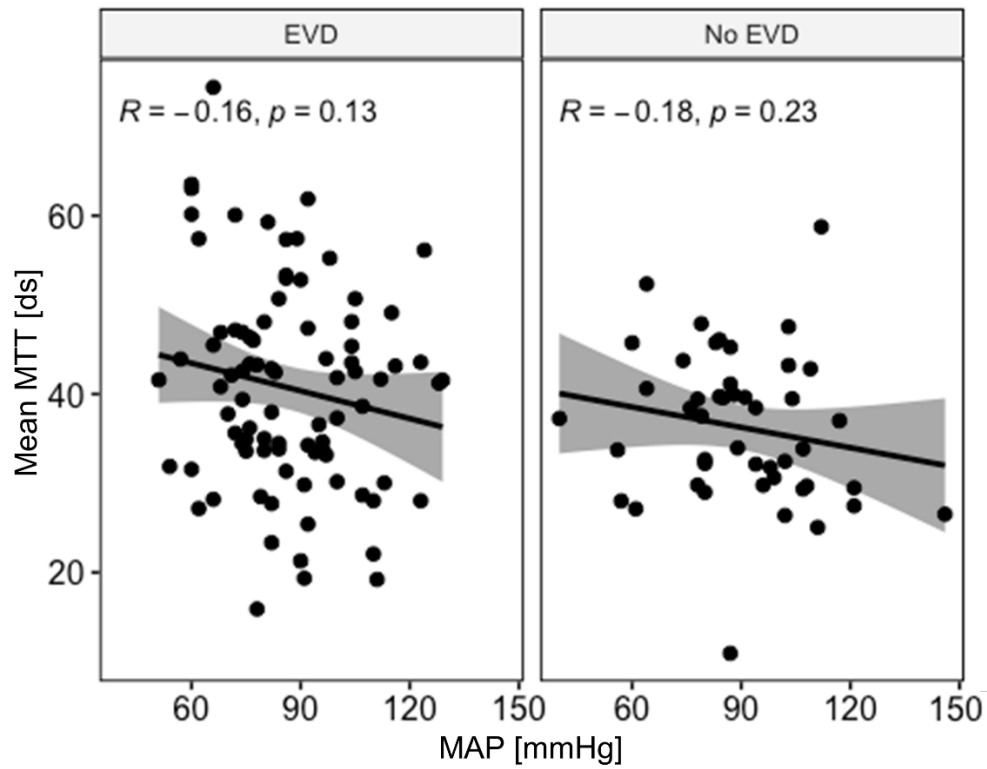

**Supplemental Figure: Subgroup analysis for patients with vs. without EVD.**

The dichotomized subgroups showed a non-significant correlation ( $R = -0.16$ , 95% CI = -0.36-0.05,  $p = 0.13$ ; left panel) for patients with EVD and for patients without EVD ( $R = -0.18$ , 95% CI = -0.44-0.12,  $p = 0.23$ ; right panel). MAP = mean arterial pressure, ds = decisecond, MTT = mean transit time, R = Regression coefficient.
